# Supplementary material for: Glucose-1,6-bisphosphate: A new gatekeeper of cerebral mitochondrial pyruvate uptake
Source: PubMed Central journal article supplement (PMC11404074; doi:10.1016/j.molmet.2024.102018), 2024-08-24
Supplement: mmc3.pdf [file mmc3.pdf]

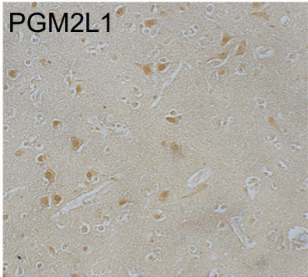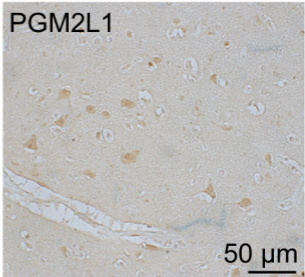

**Supplemental Figure 1:** Staining of human frontal cortex with PGM2L1 (N=2).

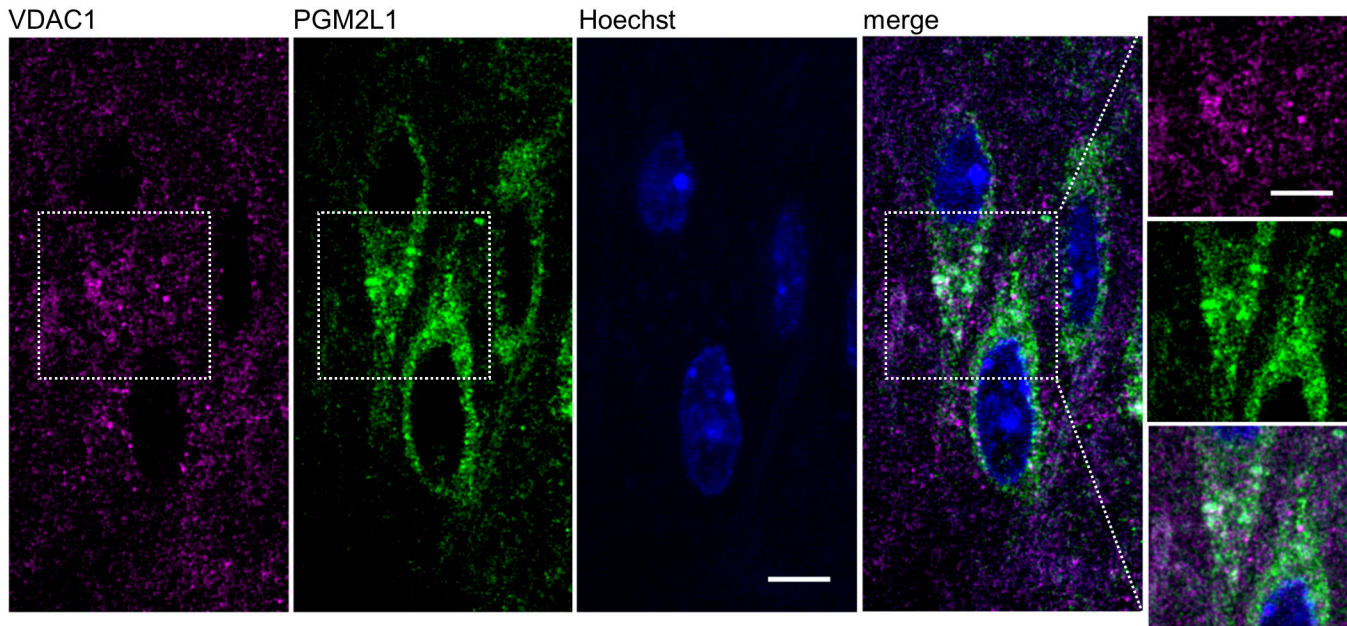

**Supplemental Figure 2:** Partial colocalization of PGM2L1 and the mitochondrial marker VDAC1 was confirmed in mouse brain. Brains were fixed in PFA overnight, incubated in sucrose (30%) and embedded in O.C.T.. Sections were cut at 20  $\mu$ m thickness and transferred on polysin slides (Thermo Fisher). Staining was performed as described in section 2.6. Scale bar refers to 5  $\mu$ m. Image is representative of 2 separate experiments.

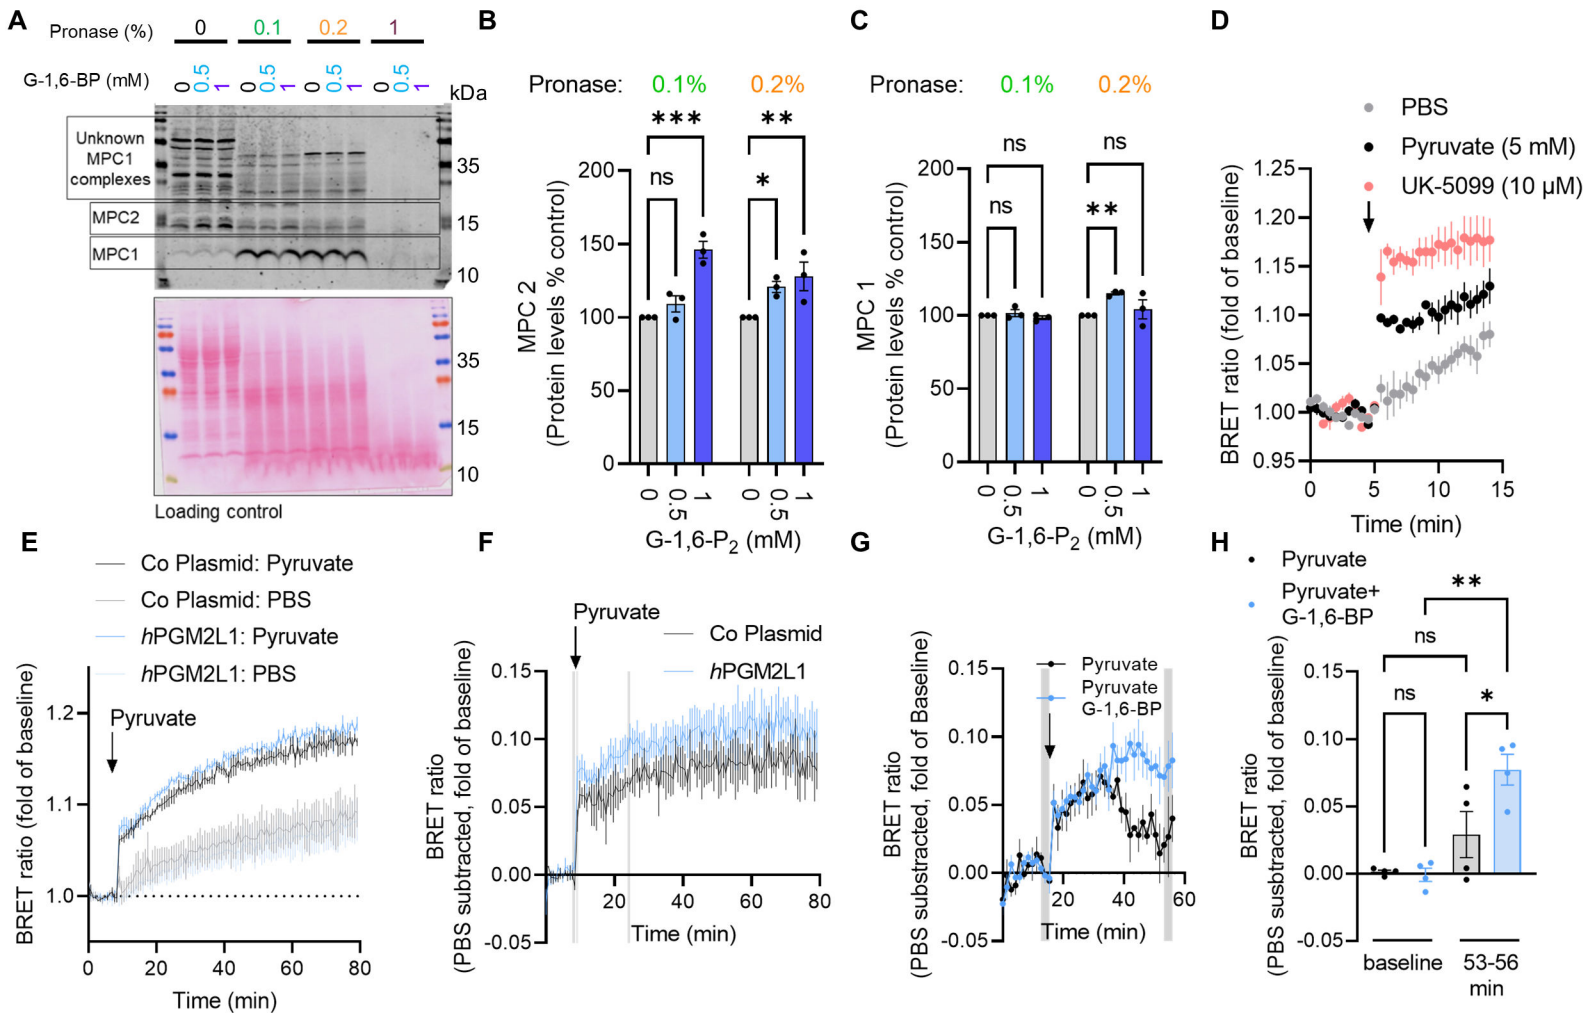

**Supplemental Figure 3:** (A) A DARTs assay was performed with hippocampal extracts and addition of exogenous Pronase at 0-1% Pronase/mg protein. Since loading controls (actin, GAPDH and tubulin) were degraded at low pronase (0.1%) concentrations, we used ponceau red staining as a loading control. (B) MPC2 was significantly protected by G-1,6-P<sub>2</sub> from Pronase-induced degradation (two way ANOVA, treatment (G-1,6-P<sub>2</sub>)  $P < 0.0001$ , (pronase)  $P > 0.05$ , (interaction)  $P < 0.05$ , Holm-Šídák's multiple comparisons test: (\*)  $P < 0.05$ , (\*\*)  $P < 0.01$ , (\*\*\*)  $P < 0.001$ , (ns) not significant). (C) MPC1 was moderately protected by G-1,6-P<sub>2</sub> from Pronase (0.2%)-induced degradation (two way ANOVA, (G-1,6-P<sub>2</sub>)  $P < 0.05$ , (pronase)  $P < 0.05$ , (interaction)  $P > 0.05$ , Holm-Šídák's multiple comparisons test: (\*\*)  $P < 0.01$ , (ns) not significant). (D) HEK cells, stably expressing the RESPYR constructs MPC1-venus (MPC1V) and MPC2-RLuc8 (MPC2R), were tested with pyruvate (5 mM) and UK-5099 (10 μM), both of which increased the BRET ratio ( $N = 3$ ). (E) The response of HEK MPC1V/MPC2R cells transfected with co Plasmid or *h*PGM2L1 were compared after addition (see arrowhead) of pyruvate (5 mM) or PBS. Values are expressed as fold of baseline.  $N = 3$ . (F) The values in (E) for PBS were subtracted from the pyruvate-treated wells. (G) HEK MPC1V/MPC2R were permeabilized with saponin (25 μg/ml) for 15 min and pyruvate (5 mM) pyruvate with G-1,6-BP (100 μM) was added. The BRET ratio is expressed as fold of baseline with the respective PBS responses subtracted. The delayed effect of G-1,6-BP might be due to diffusion restrictions to or into mitochondria. (H) The mean of the 3 baseline responses and 3 responses at 53-56 min were compared (areas marked in grey in (G), one way ANOVA with Holm-Šídák's multiple comparisons test: (\*)  $P < 0.05$ , (\*\*)  $P < 0.01$ , (ns) not significant). All data is represented as mean  $\pm$  S.E.M..
